# Supplementary material for: Fabrication and Evaluation of Quercetin Nanoemulsion: A Delivery System with Improved Bioavailability and Therapeutic Efficacy in Diabetes Mellitus
Source: MDPI journal article supplement (doi:10.3390/ph15010070), 2022-01-05

All Responses  
● Design Points  
0.000 1.000

Desirability = 1.000  
Std # 6 Run # 14  
  
X1 = A: Smix = 9  
X2 = B: Amplitude = 25

Actual Factor  
C: Sonication Time = 2.5

Supplementary Figure S2: Desirability Plot  
from Box-Behnken Design for Que-NE

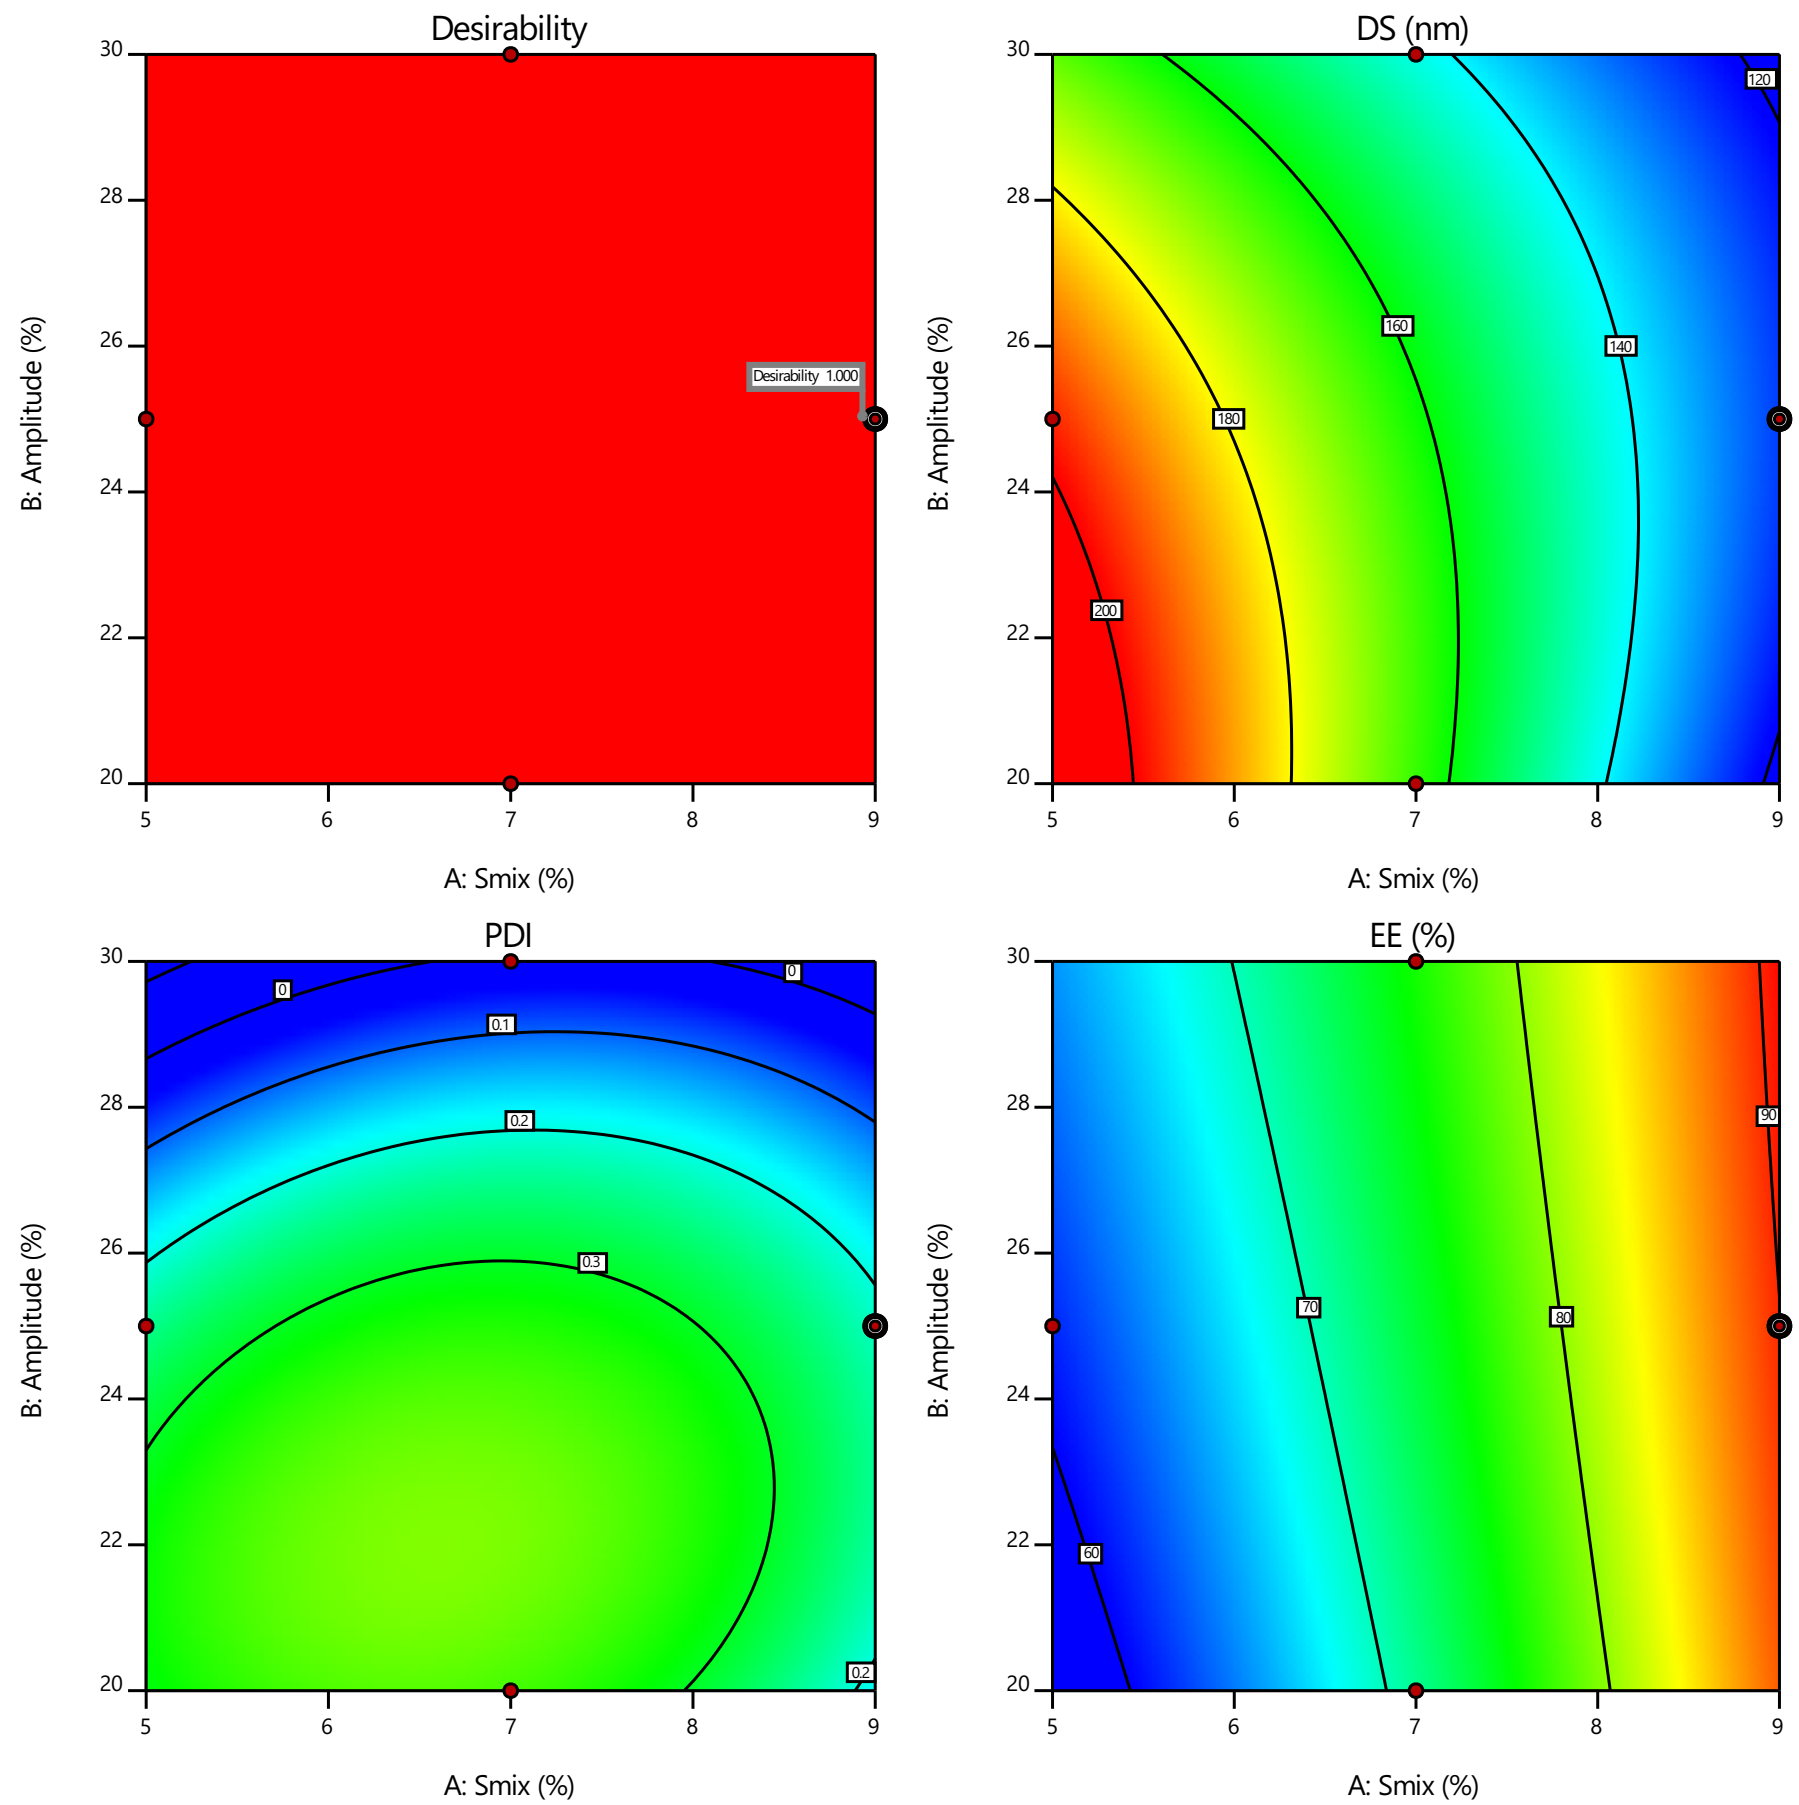

Supplement: s1 [file s1]
