# Supplementary figures and images for: Fabrication and Evaluation of Quercetin Nanoemulsion: A Delivery System with Improved Bioavailability and Therapeutic Efficacy in Diabetes Mellitus
Source: MDPI journal article supplement (doi:10.3390/ph15010070), 2022-01-05

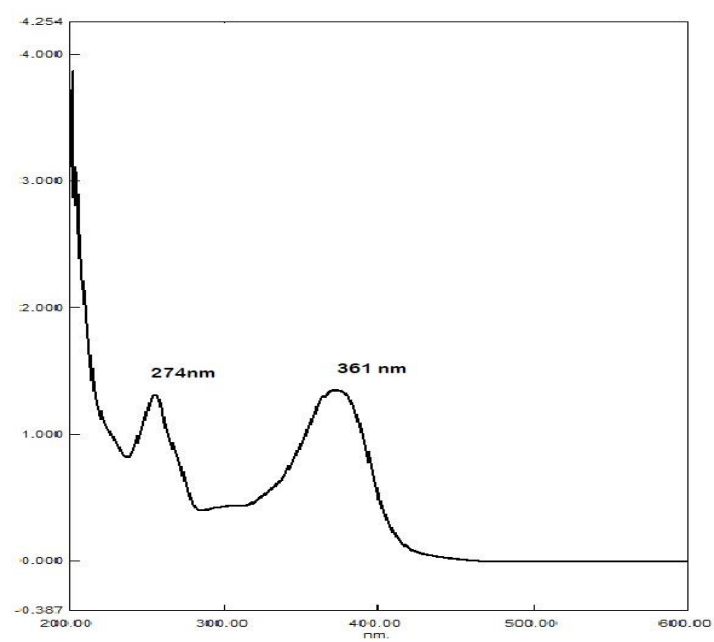

Supplementary Figure S1. UV spectrum of Quercetin in methanol

Supplement: s1 [file s1]
